# Supplementary material for: Synthesis of non-noble metal solid solution (Cd0.76Co0.17Mo0.07S) via MOF precursors for enhanced hydrogen production
Source: Royal Society of Chemistry journal article supplement (doi:10.1039/d3ta07256h), 2024-01-01
Supplement: d3ta07256h1.pdf [file d3ta07256h1.pdf]

## Supporting Information

### Synthesis of non-noble metal solid solution(Cd<sub>0.76</sub>Co<sub>0.17</sub>Mo<sub>0.07</sub>S) via MOF precursors for enhanced hydrogen production

#### Experimental section

##### Preparation of Mo-MOF

Mo-MOF was prepared by modifying the method reported by Martin<sup>[1]</sup>. 1.4 g of molybdenum trioxide and 0.664 g of imidazole were dissolved in 100 ml of aqueous solution and refluxed at 80 °C for 12 h. The product was collected and centrifuged, the product was washed twice with aqueous solution and finally dried in a vacuum drying oven at 60 °C for 12 h to obtain a white powder.

##### Preparation of CdIF-3\ZIF-67

The preparation of CdIF-3 was referred to the work of Zhong *et al*<sup>[2]</sup> with modifications: 0.7712 g of cadmium nitrate tetrahydrate and 1.642 g of 2-methylimidazole were mixed with 2.8 ml of triethylamine solution and 57 ml of methanol. After sonication for 10 minutes it was poured into an autoclave and reacted at 60 °C for 48 h. The precipitate was collected by centrifugation, washed with methanol, and dried in an oven at 60 °C for 12 h to obtain a white powder. ZIF-67 was prepared according to the work of Chen<sup>[3]</sup> with modifications: 0.33 g of cobalt nitrate hexahydrate and 0.78 g of 2-methylimidazole were dissolved in 30 ml of methanol and stirred vigorously at room temperature for 6 h. The stirred sample was collected directly from the precipitate by centrifugation, washed with methanol, and dried in an oven at 60 °C for 12 h to give a purple powder.

##### Preparation of samples for control experiments

Preparation of physical mixed samples: CdCo-MOF and Mo-MOF were directly vulcanized to CdCoS and MoS<sub>2</sub> with ethylenediamine, and then 50 mg and 3.335 mg were placed in 10 ml of ethanol solution and sonicated for 120 min, centrifuged, and then dried for 12 h at 60 °C, to obtain the physical mixed samples, which were labelled as mixed samples.

Sample preparation for vulcanization in alkaline solution as solvent at pH=9: An alkaline solution was prepared by dissolving 30mg of NaOH in 100ml of deionized water, and the pH was measured using acid-base paper at pH=9. 100 mg of CdCo-MOF and 6.67 mg of Mo-MOF were dissolved in 20 ml of the alkaline solution, and a vulcanization reaction was carried out for 8 h at 220 °C. The samples obtained by centrifugal drying were labeled as alkaline samples.

Sample preparation for direct mixed vulcanization of metal raw materials: 200 mg Cd(NO<sub>3</sub>)<sub>2</sub> • 4H<sub>2</sub>O, 55 mg Co(NO<sub>3</sub>)<sub>2</sub> • 6H<sub>2</sub>O, 37 mg MoO<sub>3</sub>, and 600 mg of thioacetamide were dissolved in 30 ml of ethylenediamine solution, and vulcanization reaction was carried out at 220 °C for 6 h, and samples obtained after centrifugation and drying were labeled as direct vulcanization samples.

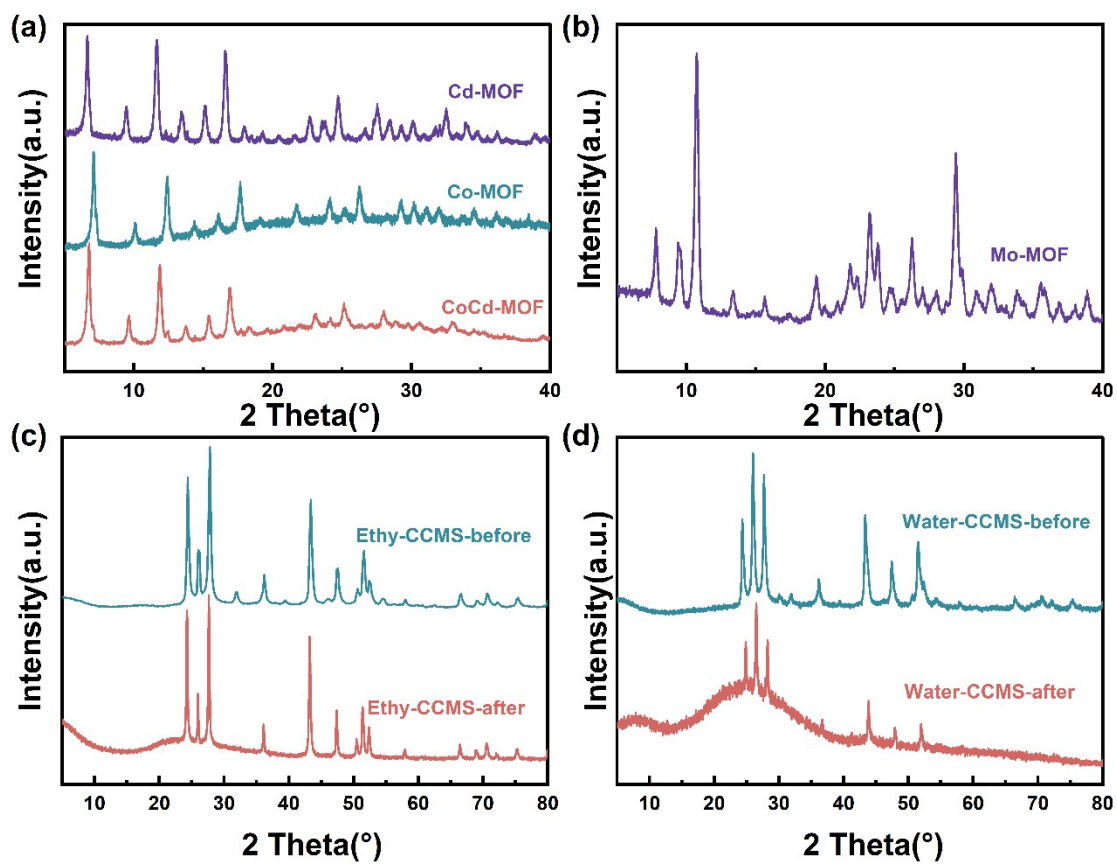

Figure S1. XRD spectra of Cd-MOF\Co-MOF\CdCo-MOF (a) and Mo-MOF (b) ;  
XRD spectra of Ethy-CCMS\Water-EEMS before and after the photocatalytic reaction (c)-(d).

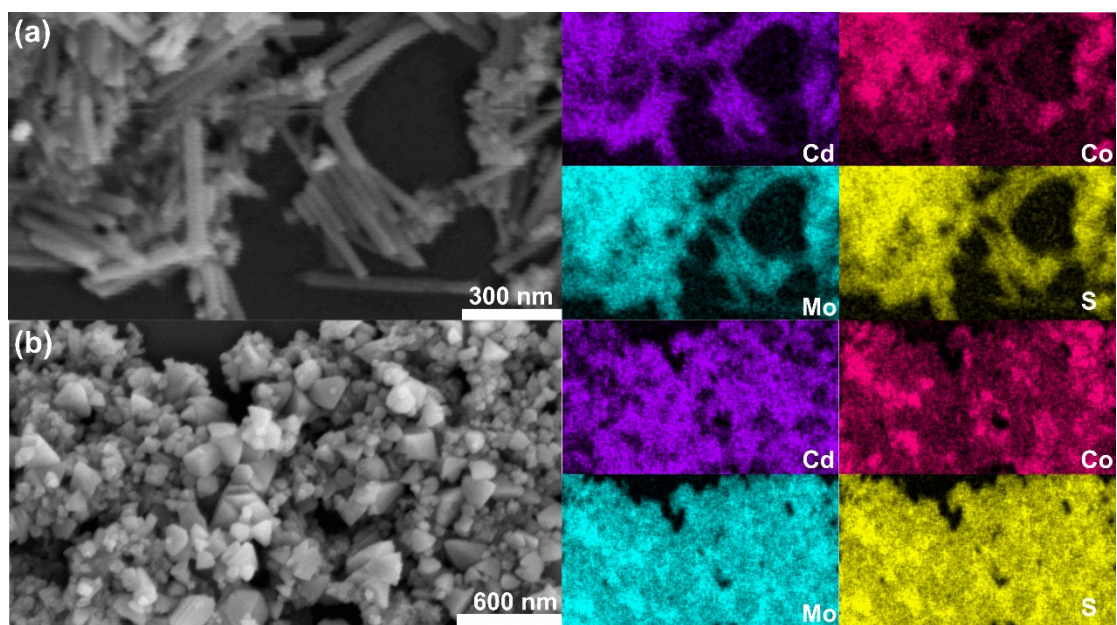

Figure S2. Elemental mapping images of Ethy-CCMS\Water-CCMS (a)-(b).

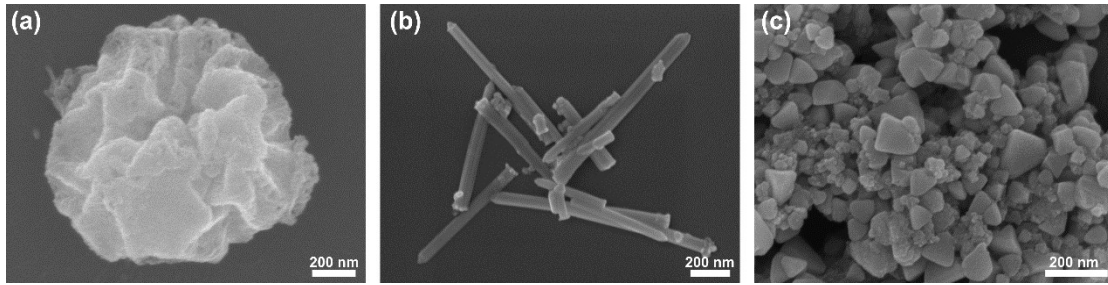

**Figure S3.** SEM image of (a) CdCo-MOF; (b) Ethy-CCMS ; (c) Water-CCMS.

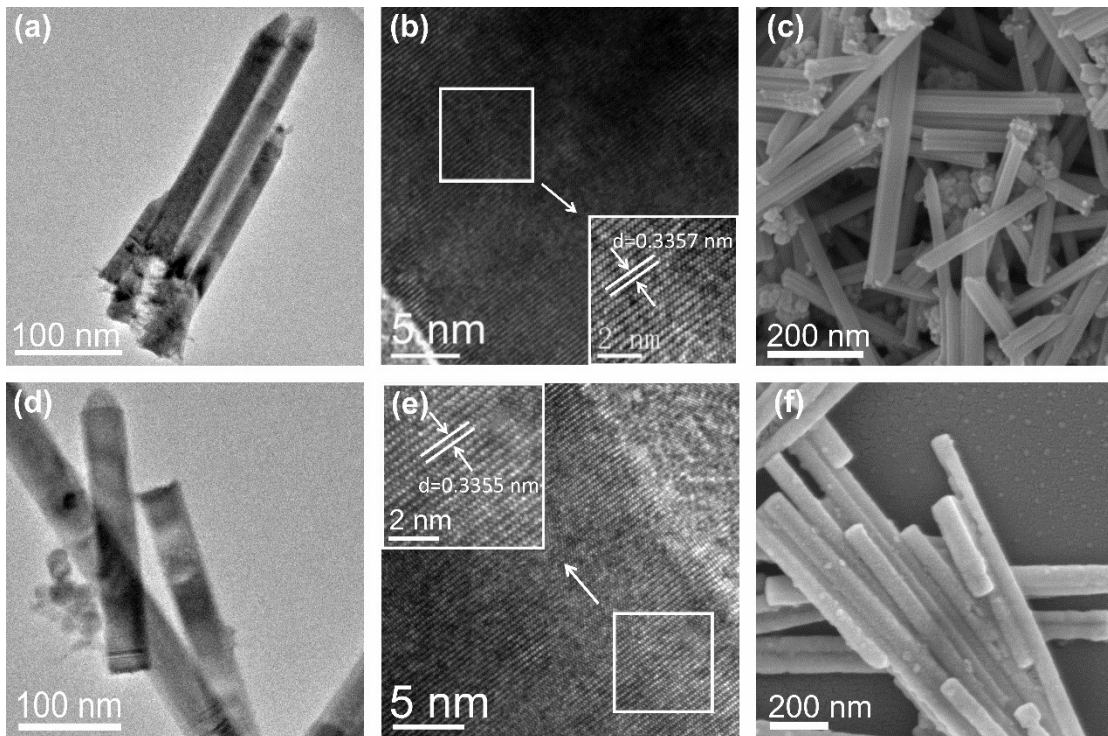

**Figure S4.** (a) (b) TEM image of Ethy-CCMS before photocatalytic reaction; (c) SEM image of Ethy-CCMS before photocatalytic reaction; (d) (e) TEM image of Ethy-CCMS after photocatalytic reaction; (f) SEM image of Ethy-CCMS after photocatalytic reaction.

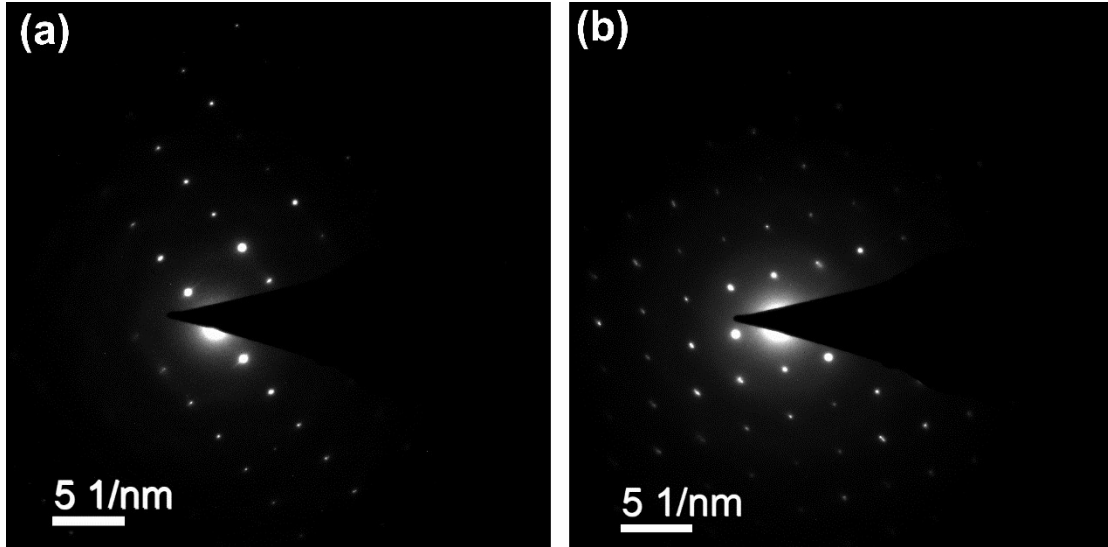

Figure S5. Selected electron diffraction maps (SAED): (a) Ethy-CCMS; (b) Water-CCMS.

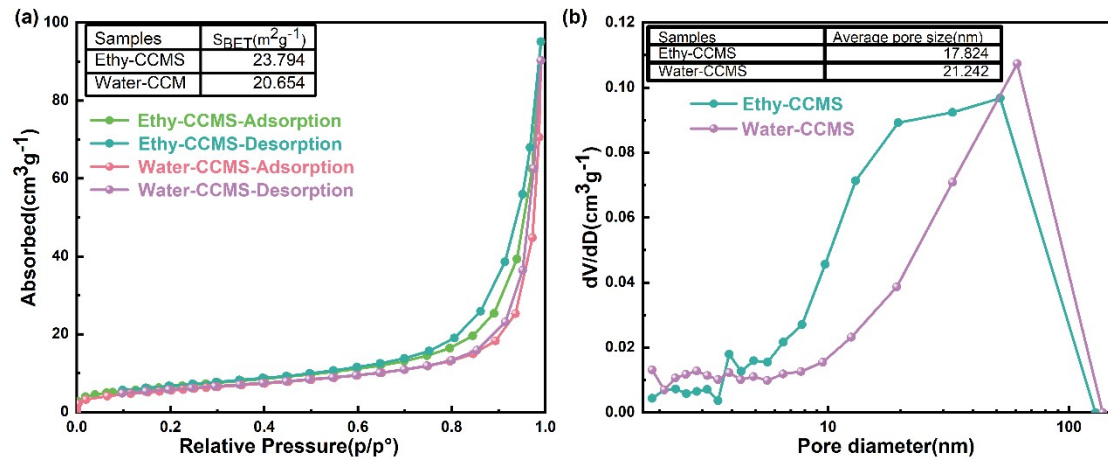

Figure S6. (a)  $N_2$  adsorption-desorption isotherms and (b) pore size distribution plots for Ethy\Water-CCMS.

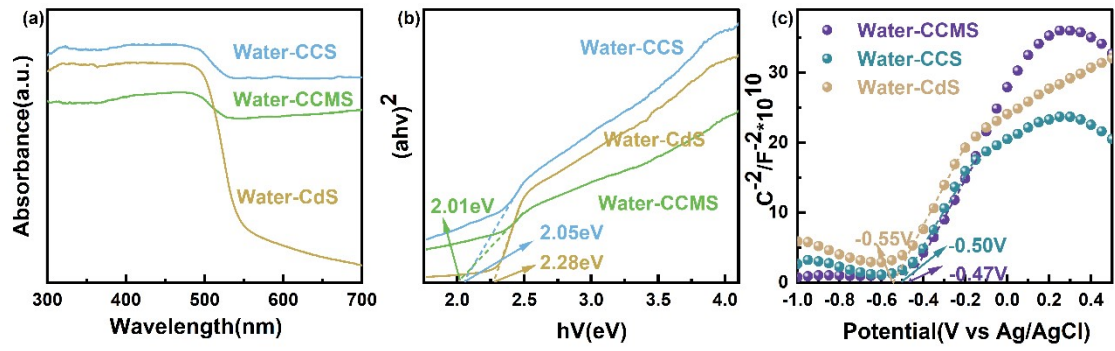

Figure S7. (a) UV-vis; (b) Tauc plots; (c) Mott-Schottky spectra of the Water-CCMS

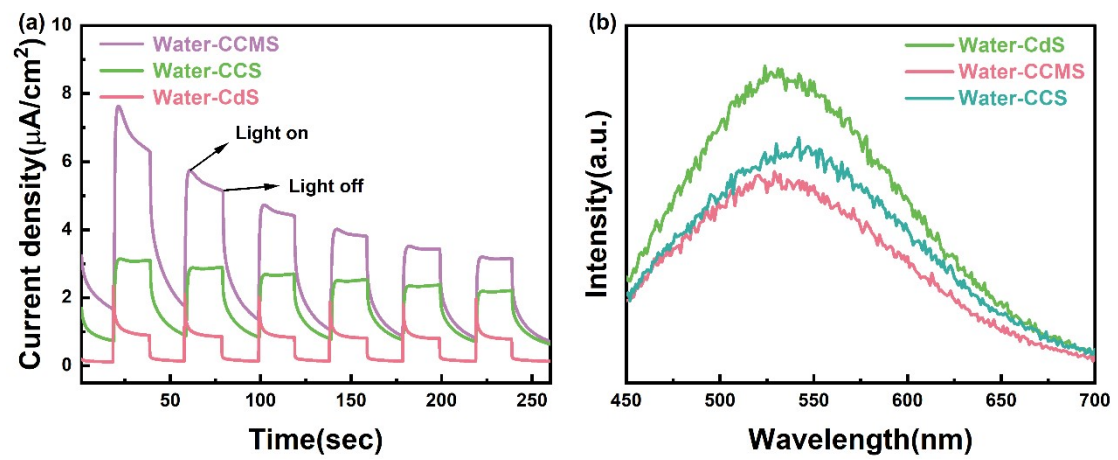

Figure S8. (a) Transition photocurrent spectra; (b) Photoluminescence spectra of the Water-CCMS.

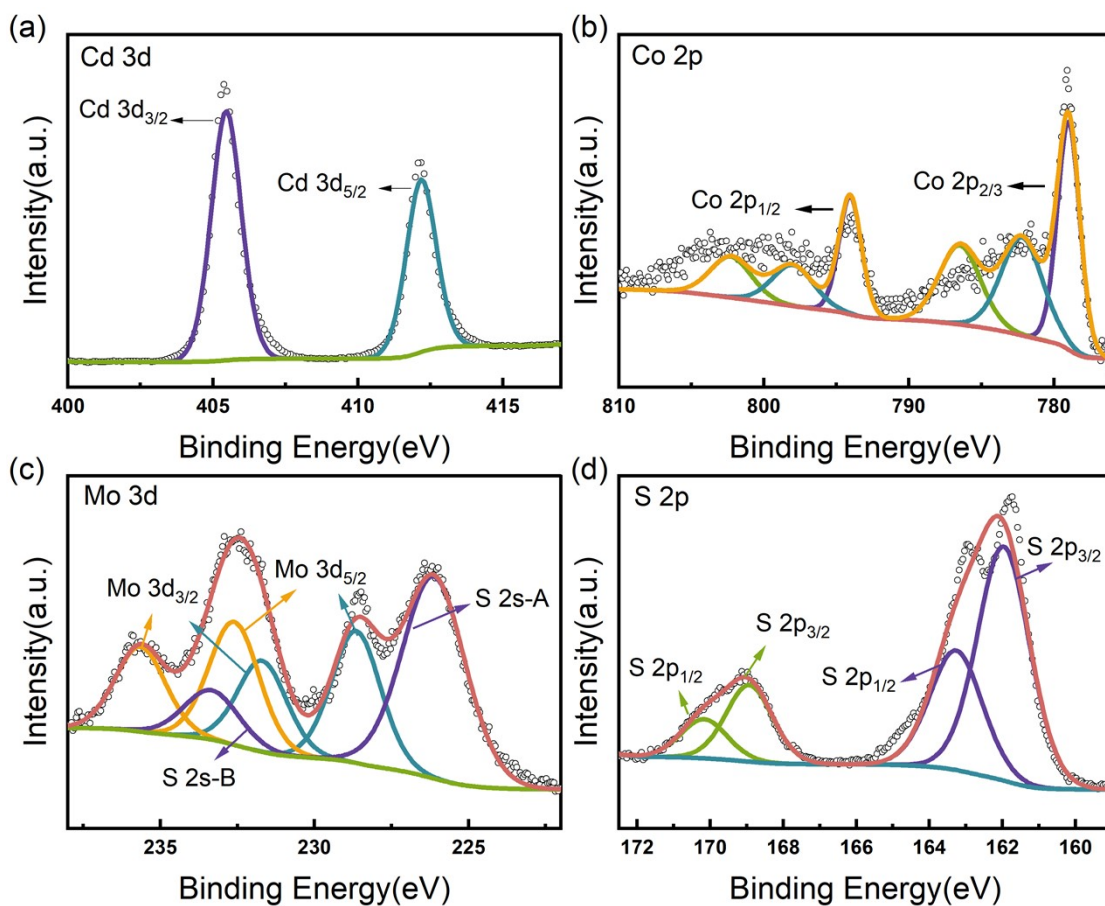

Figure S9. (a)-(d) XPS spectra of Cd, Co, Mo, S of the Water-CCMS

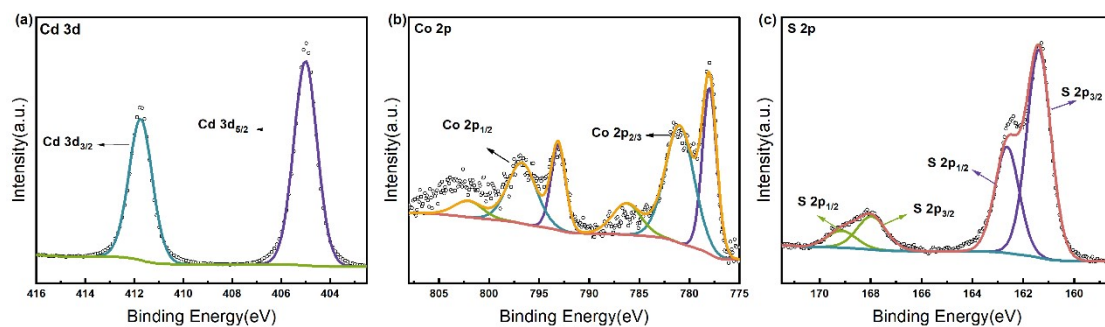

Figure S10. (a)-(c) XPS spectra of Cd, Co, Mo, S of the Ethy-CCS.

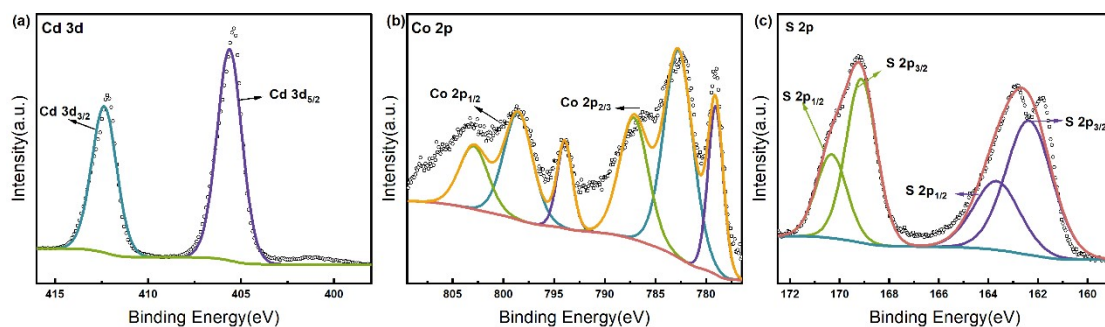

Figure S11. (a)-(c) XPS spectra of Cd, Co, Mo, S of the Water-CCS.

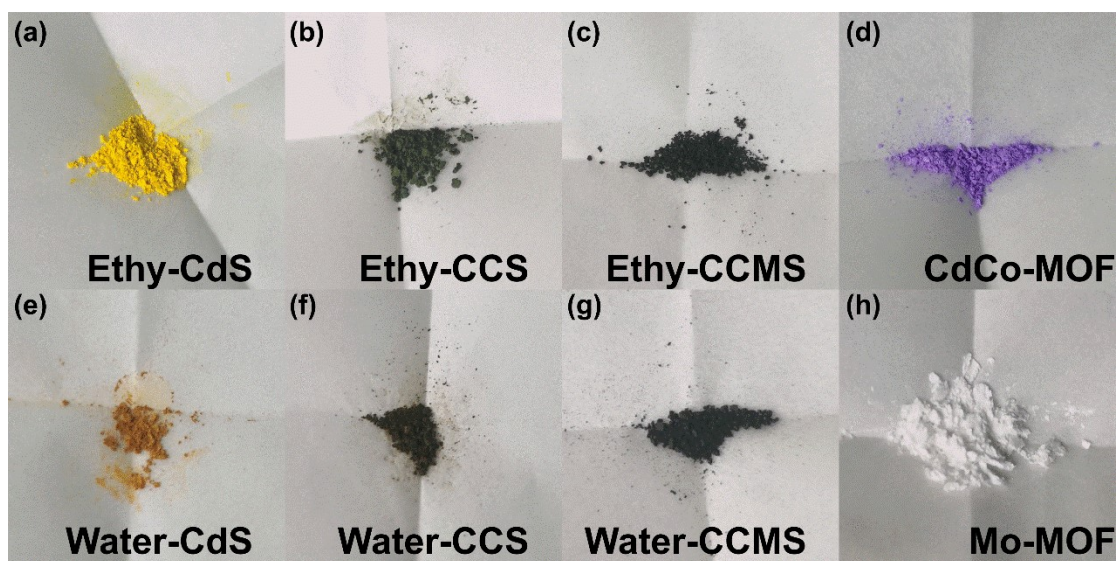

Figure S12. (a)-(h) Photo of Ethy-CdS, Ethy-CCS, Ethy-CCMS, CdCo-MOF, Water-CdS, Water-CCS, Water-CCMS, Mo-MO in daylight.

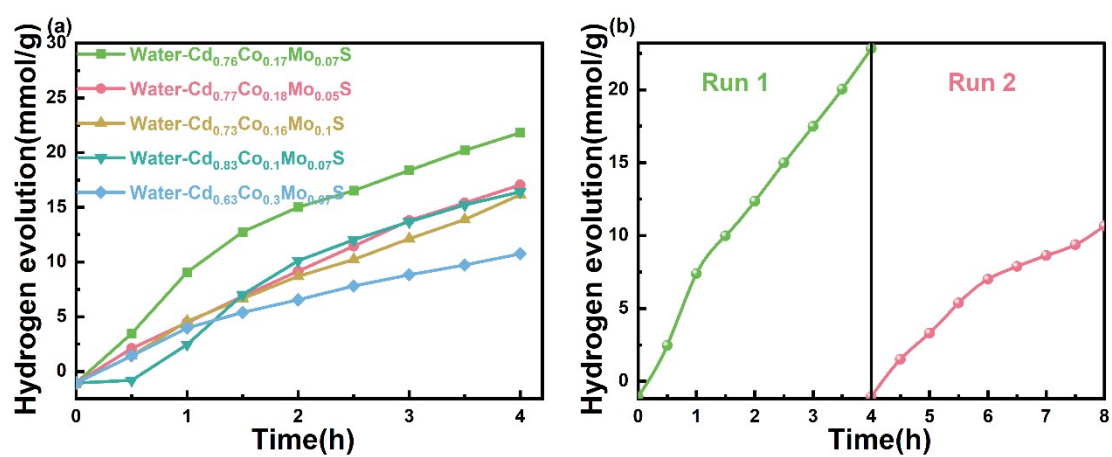

Figure S13. Hydrogen evolution rate of (a) Series of samples with different ratios of elements in water environment; (b) Cyclic

hydrogen production efficiency of Water-CCMS.

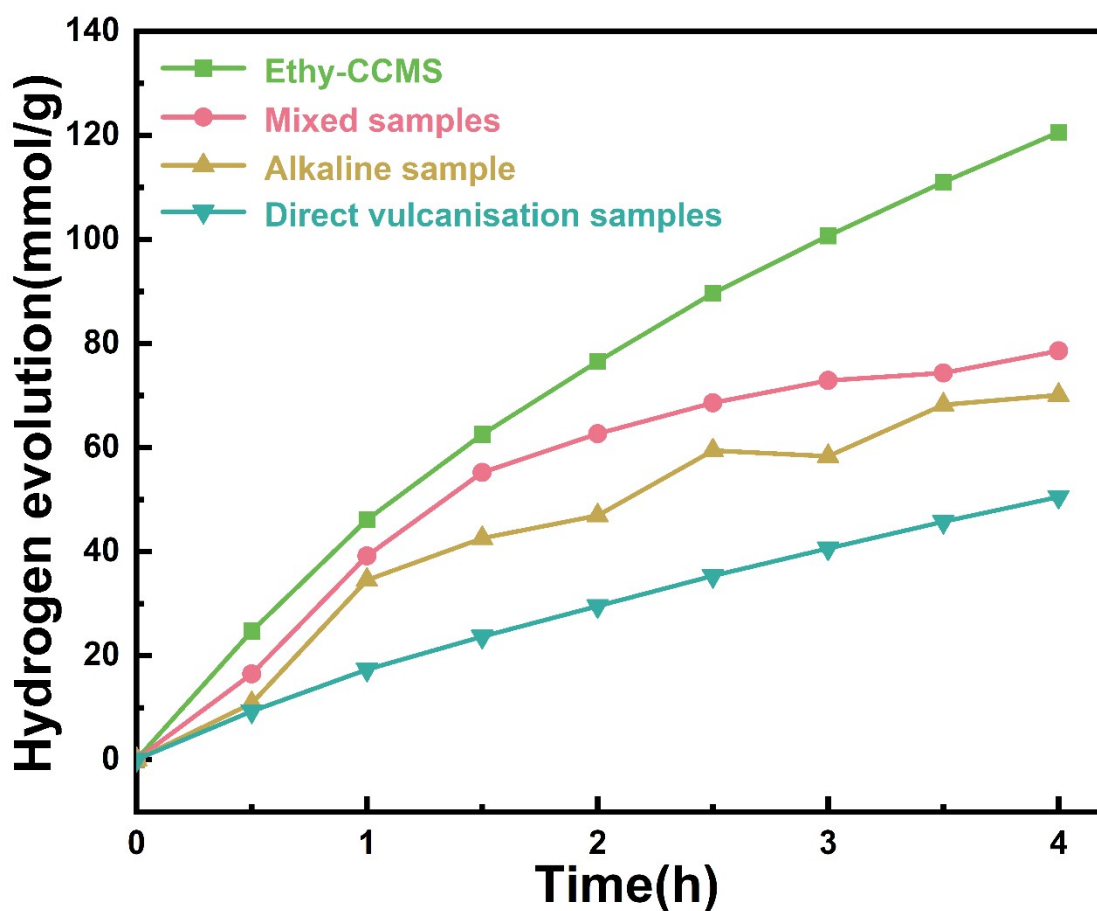

Figure S14. Hydrogen evolution rates for Ethy-CCMS, physically mixed samples, alkaline solution sulphide samples and raw material direct sulphide samples.

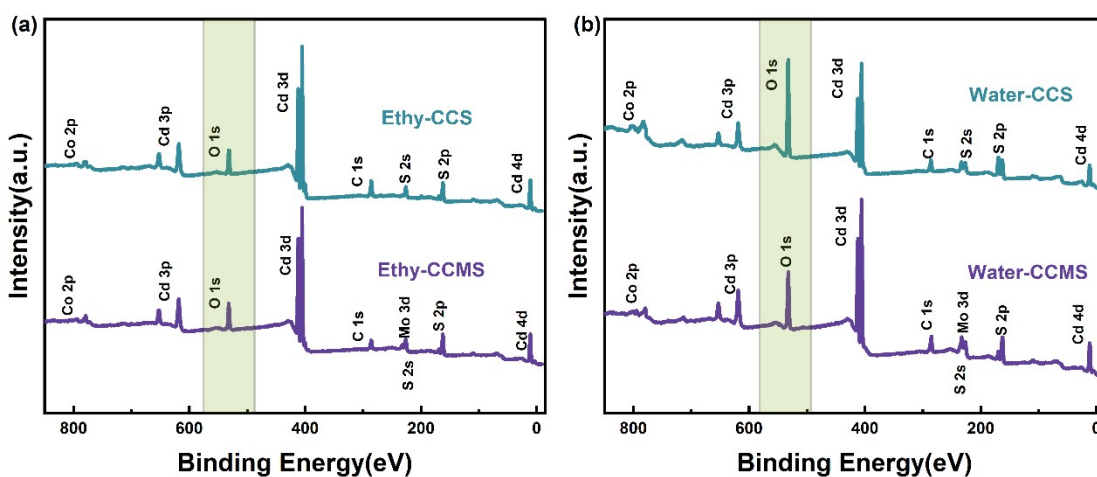

Figure S15. XPS analysis of Survey spectrum of Ethy-CCS\Ethy-CCMS and Water-CCS\Water-CCMS.



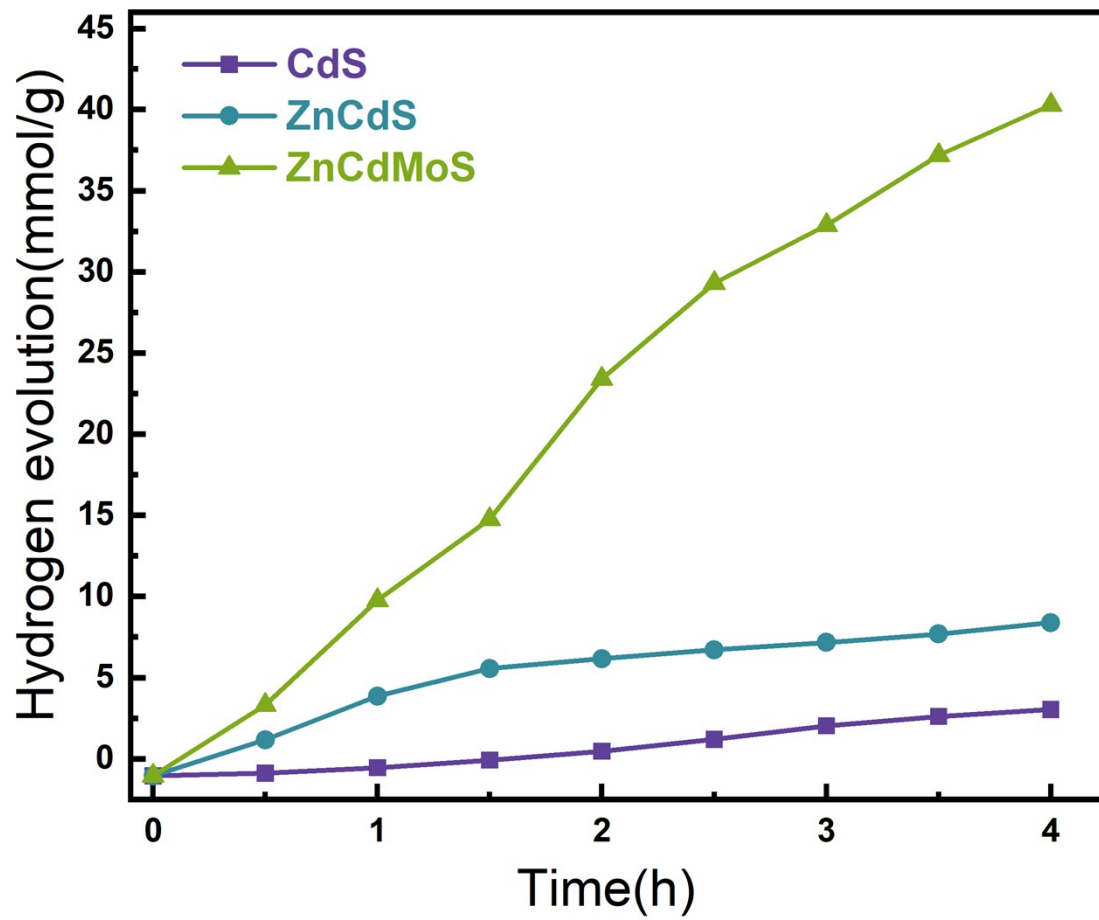

Figure S16. Hydrogen evolution rate of three precursor sulfide products, CdIF<sub>3</sub>, ZnCd-MOF, ZnCd-MOF with Mo-MOF.

---

Table S1. XPS results of elemental contents of Samples

---

| Samples    | Cd<br>(at%) | Co<br>(at%) | Mo<br>(at%) | S<br>(at%) | O<br>(at%) |
|------------|-------------|-------------|-------------|------------|------------|
| Ethy-CCS   | 18.13       | 2.36        | \           | 21.99      | 16.45      |
| Ethy-CCMS  | 21.97       | 3.07        | 1.44        | 29.22      | 18.09      |
| Water-CCS  | 9.44        | 5.73        | \           | 26.14      | 42.86      |
| Water-CCMS | 14.19       | 2.63        | 3.06        | 25.67      | 30.03      |

---

---

Table S2. ICP-AES results of elemental contents of Samples

---

| Samples    | Cd<br>(mol%) | Co<br>(mol%) | Mo<br>(mol%) |
|------------|--------------|--------------|--------------|
| Ethy-CCMS  | 41.32        | 16.55        | 2.19         |
| Water-CCMS | 48.48        | 19.18        | 5.05         |

---

Table 3. Comparison of the H<sub>2</sub>-production rates of CdS composite photocatalysts for water splitting

| Photocatalyst                                                   | Irradiation source                 | Reaction conditions                                                                              | Nobel metal cocatalyst | Activity<br>mmol g <sup>-1</sup><br>h <sup>-1</sup> | Ref       |
|-----------------------------------------------------------------|------------------------------------|--------------------------------------------------------------------------------------------------|------------------------|-----------------------------------------------------|-----------|
| Ethy-Cd <sub>0.76</sub> Cd <sub>0.17</sub> Mo <sub>0.07</sub> S | 300 W Xe lamp( $\lambda > 420$ nm) | 10 mg catalyst 50 mL 10 vol% lactic acid aqueous                                                 | \                      | 30.14                                               | This work |
| CdS/PBC                                                         | 300 W Xe lamp( $\lambda > 420$ nm) | 25 mg catalyst 50 mL 0.35M Na <sub>2</sub> S and 0.25M Na <sub>2</sub> SO <sub>3</sub> aqueous   | \                      | 14.67                                               | [4]       |
| MoS <sub>2</sub> -CdS/GDY-10%                                   | 300 W Xe lamp( $\lambda > 420$ nm) | 100mg catalyst 100 mL 0.35 M Na <sub>2</sub> S and 0.25M Na <sub>2</sub> SO <sub>3</sub> aqueous | \                      | 17.99                                               | [5]       |
| MoS <sub>2</sub> -tipped nanorod                                | CdS<br>300 W Xe lamp(AM 1.5)       | 100 mg catalyst 60ml supernatant collected from plastic pretreatment                             | \                      | 6.68                                                | [6]       |
| CdS@CoS/WS <sub>2</sub>                                         | 300 W Xe lamp( $\lambda > 420$ nm) | 100 mg catalyst 100mL of 25 vol% methanol/H <sub>2</sub> O solution                              | \                      | 10.62                                               | [7]       |
| CdS/PT                                                          | 350 W Xe lamp( $\lambda > 420$ nm) | 10 mg catalyst 80 mL 10 vol% lactic acid aqueous solution                                        | Pt                     | 9.28                                                | [8]       |
| P-MoS <sub>2</sub> /CdS                                         | 300 W Xe lamp( $\lambda > 420$ nm) | 10 mg catalyst 100 mL 0.35M Na <sub>2</sub> S and 0.25M Na <sub>2</sub> SO <sub>3</sub> aqueous  | \                      | 5.89                                                | [9]       |
| MoS <sub>2</sub> /CdS                                           | 300 W Xe lamp( $\lambda > 420$ nm) | 20 mg catalyst 100 mL 20 vol% lactic acid aqueous solution                                       | \                      | 15.5                                                | [10]      |
| CdS@MoS <sub>2</sub>                                            | 300 W Xe lamp( $\lambda > 420$ nm) | 20 mg catalyst 100mL 10 vol% lactic acid aqueous solution                                        | \                      | 15.26                                               | [11]      |
| MoS <sub>2</sub> /CdS                                           | 300 W Xe lamp( $\lambda > 420$ nm) | 50 mg catalyst 100mL 10 vol% lactic acid aqueous solution                                        | \                      | 10.672                                              | [12]      |
| CdS/Co <sub>3</sub> S <sub>8</sub>                              | 300 W Xe lamp(AM 1.5)              | 20 mg catalyst 100 mL Na <sub>2</sub> S and Na <sub>2</sub> SO <sub>3</sub> aqueous              | \                      | 1.06                                                | [13]      |

---

|                                           |                                   |   |    |                                                            |   |       |      |
|-------------------------------------------|-----------------------------------|---|----|------------------------------------------------------------|---|-------|------|
| 5%CoP/CdS-P                               | 30x3<br>lamp( $\lambda > 420$ nm) | W | Xe | 5mg catalyst 20 mL water                                   | \ | 0.231 | [14] |
| b-TiO <sub>2</sub> /MoS <sub>2</sub> /CdS | 300<br>lamp( $\lambda > 400$ nm)  | W | Xe | 20 mg catalyst 100mL 10 vol% lactic acid aqueous solution  | \ | 9     | [15] |
| M-t-CdS Nrs                               | 300<br>lamp(AM 1.5)               | W | Xe | 30 mg catalyst 90mL 28.6 vol% lactic acid aqueous solution | \ | 8.44  | [16] |
| MoS <sub>0.2</sub> /CdS-N                 | 300<br>lamp( $\lambda > 400$ nm)  | W | Xe | 50 mg catalyst 100mL 10 vol% lactic acid aqueous solution  | \ | 10.1  | [17] |

---

## References

1. Martin-Zarza, P. *J. Chem. Soc, Dalton Trans.* 1993, 1551.
2. G. Zhong and D. Liu, *Advanced Materials Interfaces*, 2022, **9**.
3. Y. Z. Chen, C. Wang, Z. Y. Wu, Y. Xiong, Q. Xu, S. H. Yu and H. L. Jiang, *Adv Mater*, 2015, **27**, 5010-5016.
4. C. Deng, X. Ling, L. Peng, T. Wang, R. Xu, Y. Zhu, W. Zhang, P. Sun, Y. Wu, H. Hu, Y. Han and H. Le, *Applied Surface Science*, 2023, **623**.
5. L. Zhang, Y. Wu, J. Li, Z. Jin, Y. Li and N. Tsubaki, *Materials Today Physics*, 2022, **27**.
6. M. Du, Y. Zhang, S. Kang, X. Guo, Y. Ma, M. Xing, Y. Zhu, Y. Chai and B. Qiu, *ACS Catalysis*, 2022, **12**, 12823-12832.
7. W. Kong, Z. Xing, H. Zhang, B. Fang, Y. Cui, Z. Li, P. Chen and W. Zhou, *Journal of Materials Chemistry C*, 2022, **10**, 18164-18173.
8. C. Cheng, B. He, J. Fan, B. Cheng, S. Cao and J. Yu, *Adv Mater*, 2021, **33**, e2100317.
9. J. Xu, X. Yan, Y. Qi, Y. Fu, C. Wang and L. Wang, *Chemical Engineering Journal*, 2019, **375**.
10. A. Wu, C. Tian, Y. Jiao, Q. Yan, G. Yang and H. Fu, *Applied Catalysis B: Environmental*, 2017, **203**, 955-963.
11. X. Qian, J. Zhang, Z. Guo, S. Liu, J. Liu and J. Lin, *Applied Surface Science*, 2019, **481**, 795-801.
12. J. Shi, L. Yang, J. Zhang, Z. Wang, W. Zhu, Y. Wang and Z. Zou, *Chemistry*, 2022, **28**, e202202019.
13. B. Qiu, Q. Zhu, M. Du, L. Fan, M. Xing and J. Zhang, *Angew Chem Int Ed Engl*, 2017, **56**, 2684-2688.
14. R. Shi, H. F. Ye, F. Liang, Z. Wang, K. Li, Y. Weng, Z. Lin, W. F. Fu, C. M. Che and Y. Chen, *Adv Mater*, 2018, **30**.
15. B. Sun, W. Zhou, H. Li, L. Ren, P. Qiao, W. Li and H. Fu, *Adv Mater*, 2018, **30**, e1804282.
16. K. Zhang, J. K. Kim, M. Ma, S. Y. Yim, C.-L. Lee, H. Shin and J. H. Park, *Advanced Functional Materials*, 2016, **26**, 4527-4534.
17. X. Fu, L. Zhang, L. Liu, H. Li, S. Meng, X. Ye and S. Chen, *Journal of Materials Chemistry A*, 2017, **5**, 15287-15293.
